# Supplementary material for: Ytterbium stabilized ordered mesoporous titania for near-infrared photocatalysis
Source: Royal Society of Chemistry journal article supplement (doi:10.1039/c1cc12539g), 2011-01-01
Supplement: c1cc12539g.pdf [file c1cc12539g.pdf]

# Supplementary Material (ESI) for Chemical Communications

## Ytterbium Stabilized Ordered Mesoporous Titania for Near-infrared Photocatalysis

Zhen-Xing Li, Fu-Bo Shi, Tao Zhang, Hao-Shuai Wu, Ling-Dong Sun, Chun-Hua Yan\*

Beijing National Laboratory for Molecular Sciences, State Key Laboratory of Rare Earth Materials Chemistry and Applications & PKU-HKU Joint Laboratory in Rare Earth Materials and Bioinorganic Chemistry, Peking University, Beijing 100871, China

### Experimental Section

**Preparation of ordered mesoporous  $\text{TiO}_2\text{:Yb}^{3+}$ :** 0.9 g of Pluronic F127 was dissolved in 20 mL of ethanol at room temperature (R.T.). Then 1.048 g (4 mmol) of titanyl acetylacetonate and 0.449 g (1 mmol) of  $\text{Yb}(\text{NO}_3)_3 \cdot 5\text{H}_2\text{O}$  were added into the above solution with vigorous stirring. The mixture are covered with polyethylene (PE) film, stirred at R.T. for about 5 h, and then put into a 100 °C drying oven to undergo the solvent evaporation process. After two days aging, the resultant material was calcined at 400 °C for 4 h in air by slowly increasing temperature from R.T. to 400 °C (1 °C min<sup>-1</sup> ramping rate). High temperature treatment was carried out in air for 1h with a temperature ramp of 10 °C min<sup>-1</sup>.

**Preparation of ordered mesoporous  $\text{TiO}_2\text{:Yb}^{3+}, \text{Tm}^{3+}$ :** 0.9 g of Pluronic F127 was dissolved in 20 mL of ethanol at room temperature (R.T.). Then 1.048 g (4 mmol) of titanyl acetylacetonate, 0.449 g (1 mmol) of  $\text{Yb}(\text{NO}_3)_3 \cdot 5\text{H}_2\text{O}$  and 0.046 g (0.1 mmol)  $\text{Tm}(\text{NO}_3)_3 \cdot 6\text{H}_2\text{O}$  were added into the above solution with vigorous stirring. The mixture are covered with PE film, stirred at R.T. for about 5 h, and then put into a 100 °C drying oven to undergo the solvent evaporation process. After two days aging, the resultant material was calcined at 400 °C for 4 h in air by slowly increasing temperature from R.T. to 400 °C (1 °C min<sup>-1</sup> ramping rate). High temperature treatment was carried out in air for 1h with a temperature ramp of 10 °C min<sup>-1</sup>.

**Preparation of worm-like mesoporous  $\text{TiO}_2\text{:Yb}^{3+}, \text{Tm}^{3+}$ :** 0.9 g of Pluronic F127 was dissolved in 20 mL of ethanol at room temperature (R.T.). Then 1.048 g (4 mmol) of titanyl acetylacetonate, 0.449 g (1 mmol) of  $\text{Yb}(\text{NO}_3)_3 \cdot 5\text{H}_2\text{O}$  and 0.046 g (0.1 mmol)  $\text{Tm}(\text{NO}_3)_3 \cdot 6\text{H}_2\text{O}$  were added into the above solution with vigorous stirring. The mixture are covered with PE film, stirred at R.T. for about 5 h, and then put into a 60 °C drying oven to undergo the solvent evaporation process. After two days aging, the resultant material was calcined at 400 °C for 4 h in air by slowly increasing temperature from R.T. to 400 °C (1 °C min<sup>-1</sup> ramping rate). High temperature treatment was carried out in air for 1h with a temperature ramp of 10 °C min<sup>-1</sup>.

# Supplementary Material (ESI) for Chemical Communications

**Preparation of mesoporous  $\text{TiO}_2$ :** 0.9 g of Pluronic F127 was dissolved in 20 mL of ethanol at room temperature (R.T.). Then 1.310 g (5 mmol) of titanyl acetylacetonate was added into the above solution with vigorous stirring. The mixture are covered with PE film, stirred at R.T. for about 5 h, and then put into a 100 °C drying oven to undergo the solvent evaporation process. After two days aging, the resultant material was calcined at 400 °C for 4 h in air by slowly increasing temperature from R.T. to 400 °C (1 °C min<sup>-1</sup> ramping rate).

**Preparation of mesoporous  $\text{SiO}_2\text{:Yb}^{3+},\text{Tm}^{3+}$ :** 1 g of Pluronic 123 was dissolved in 6 mL of ethanol at room temperature (R.T.). Then 2.08 g of TEOS, 0.2 g of aqueous HCl (1 mol/L), 1.122 g (2.5 mmol) of  $\text{Yb}(\text{NO}_3)_3 \cdot 5\text{H}_2\text{O}$  and 0.115 g (0.25 mmol)  $\text{Tm}(\text{NO}_3)_3 \cdot 6\text{H}_2\text{O}$  were added into the above solution with vigorous stirring. The mixture are covered with PE film, stirred at R.T. for about 5 h, and then put into a 30 °C drying oven to undergo the solvent evaporation process. After two days aging, the gel was heated at 60 °C for one day to remove ethanol completely. The resultant material was calcined at 550 °C for 4 h in air by slowly increasing temperature from R.T. to 550 °C (1 °C min<sup>-1</sup> ramping rate).

**Degradation of rhodamine B:** The mesoporous  $\text{TiO}_2\text{:Yb}^{3+},\text{Tm}^{3+}$  (calcinated at 700 °C) and mesoporous pure  $\text{TiO}_2$  were dispersed into 1 mL rhodamine B (RhB) aqueous solution (10 mg L<sup>-1</sup>) and the resulting solution was stirred in dark for 2 h to equilibrate the adsorption-desorption of RhB on the sample surface. The 2 W 980 nm laser was used as an irradiation source. At given time intervals, the supernate was analyzed by recording the variations of the absorption band maximum (554 nm) on a Shimadzu UV-3100 spectrometer. For comparison, all the samples tested for the activity were weighted exactly same (50 mg).

**Characterization:** The small and wide angle X-ray diffraction (XRD) patterns were recorded on a Rigaku D/MAX-2000 diffractometer (Japan) using Cu-K $\alpha$  radiation. Transmission electronic microscopy (TEM), and selected area electron diffraction (SAED) were performed with a JEOL-2100 transmission electron microscope (Japan) operated at 200 kV. Energy-dispersive X-ray spectroscopy (EDS) were taken on a JEOL-2100F transmission electron microscope (Japan) equipped with an EDS detector. The UC luminescence spectra were recorded on a Hitachi F-4500 fluorescence spectrophotometer equipped with an external tunable 2 W 980 nm laser diode. The UV-vis spectra was recorded on a Hitachi U-3010 spectrometer. The nitrogen adsorption and desorption isotherms at 78.3 K were measured on an ASAP 2010 analyzer (Micromeritics Co. Ltd.). Measurements were performed after outgassing the sample at 573 K under a vacuum, down to a residual pressure less than 10<sup>-3</sup> Torr. With the Barrett-Joyner-Halenda (BJH) model, the pore volumes and pore size distributions were derived from the desorption branches of the isotherms.

# Supplementary Material (ESI) for Chemical Communications

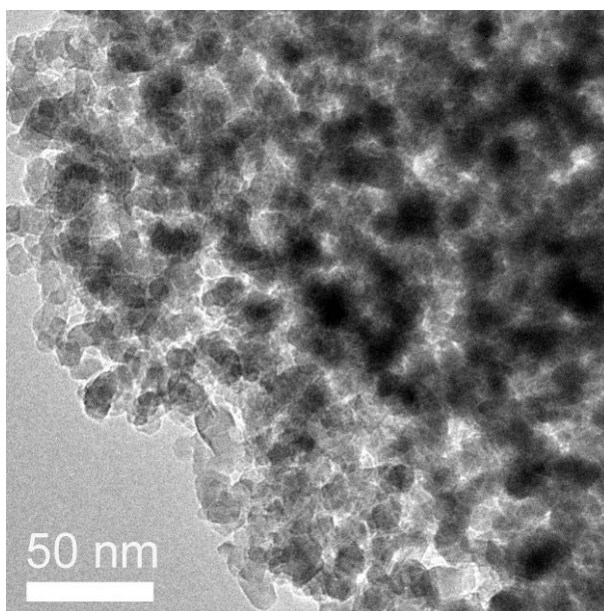

**Fig. S1** TEM image of the mesoporous  $\text{TiO}_2$  without doping  $\text{Yb}^{3+}$ .

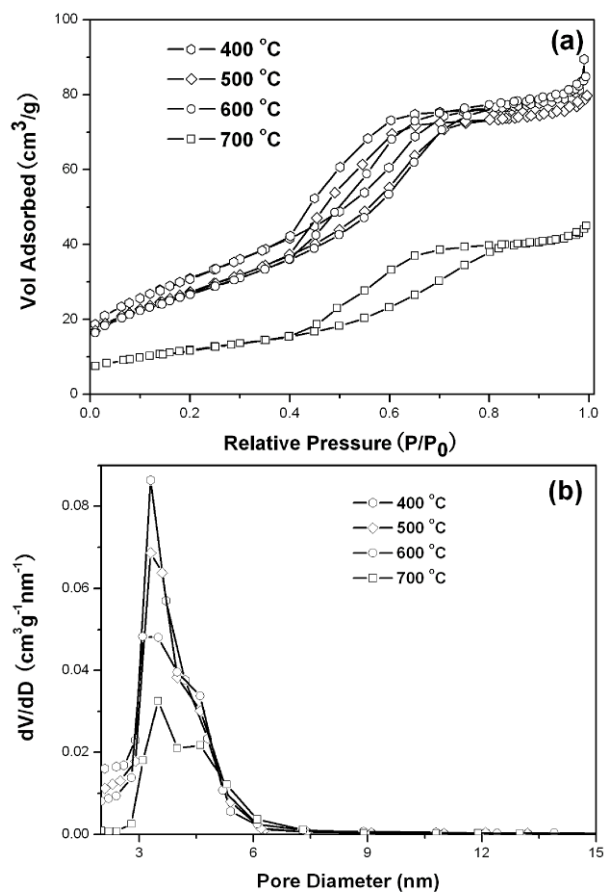

**Fig. S2** (a) Nitrogen adsorption-desorption isotherms of the ordered mesoporous  $\text{TiO}_2:\text{Yb}^{3+}$  calcined at different temperatures. (b) Pore size distribution curves of the ordered mesoporous  $\text{TiO}_2:\text{Yb}^{3+}$  calcined at different temperatures.

# Supplementary Material (ESI) for Chemical Communications

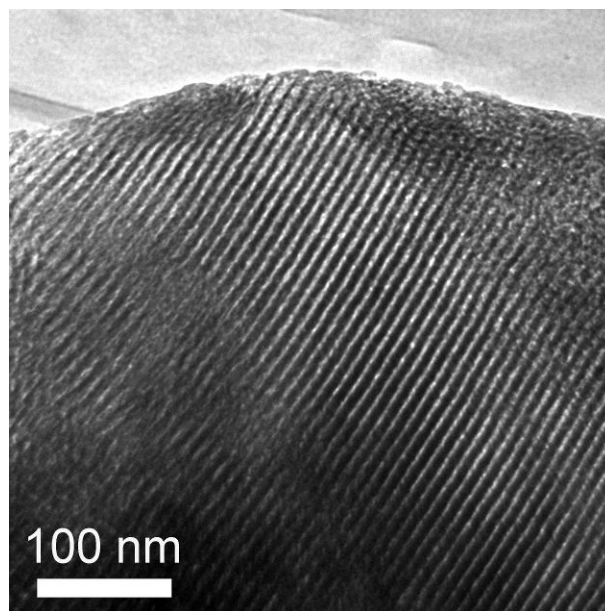

**Fig. S3** TEM image of the ordered mesoporous  $\text{TiO}_2:\text{Yb}^{3+}, \text{Tm}^{3+}$ .

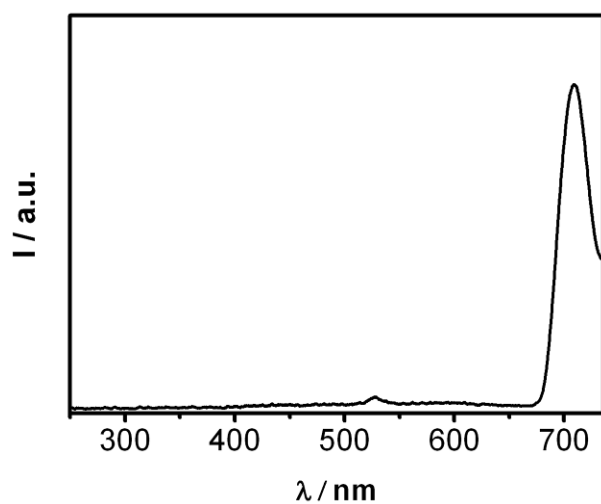

**Fig. S4** Upconversion luminescence spectra of the ordered mesoporous  $\text{TiO}_2:\text{Yb}^{3+}, \text{Tm}^{3+}$ .

# Supplementary Material (ESI) for Chemical Communications

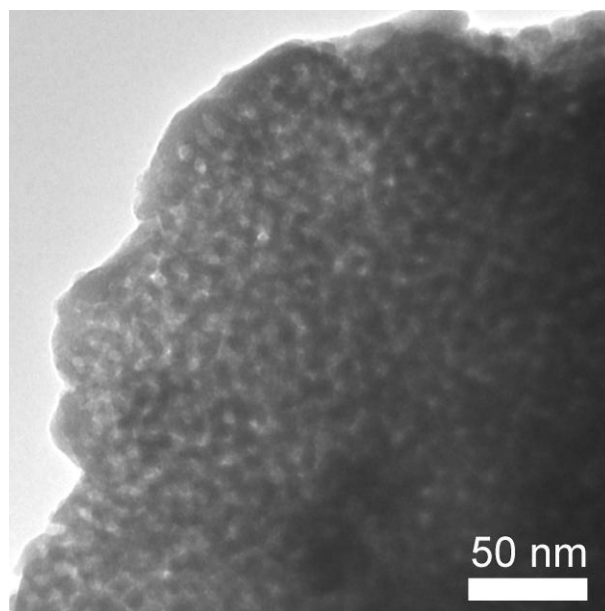

**Fig. S5** TEM image of the worm-like mesoporous  $\text{TiO}_2:\text{Yb}^{3+},\text{Tm}^{3+}$ .

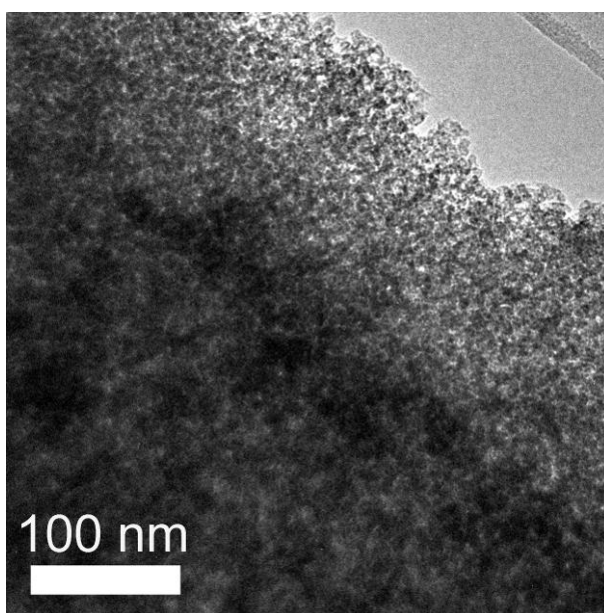

**Fig. S6** TEM image of the mesoporous  $\text{SiO}_2:\text{Yb}^{3+},\text{Tm}^{3+}$ .

# Supplementary Material (ESI) for Chemical Communications

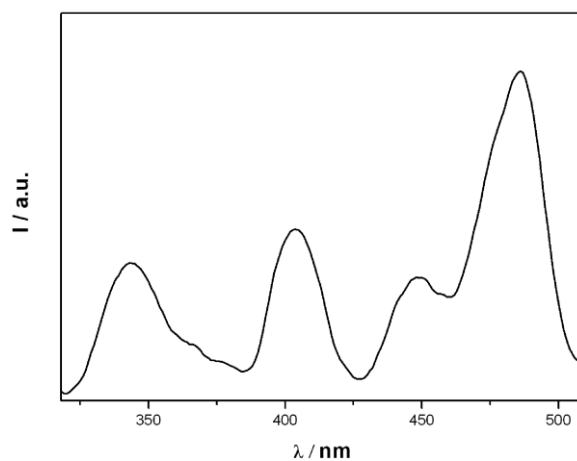

**Fig. S7** Upconversion luminescence spectra of the the mesoporpous SiO<sub>2</sub>:Yb<sup>3+</sup>,Tm<sup>3+</sup>.

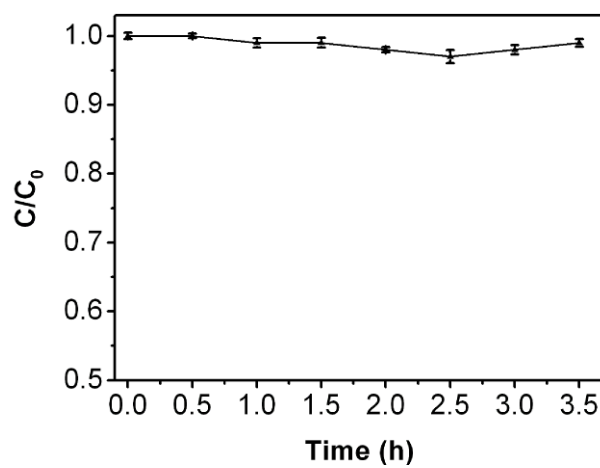

**Fig. S8** Photocatalytic result of the mesoporpous SiO<sub>2</sub>:Yb<sup>3+</sup>,Tm<sup>3+</sup>.
